# Supplementary material for: Attribution of aerosol particle number size distributions to main sources using an 11-year urban dataset
Source: Copernicus journal article supplement (doi:10.5194/acp-24-5695-2024), 2024-05-16
Supplement: Supplementary file 1 [file acp-24-5695-2024-supplement.pdf]

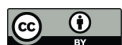

*Supplement of*

## **Attribution of aerosol particle number size distributions to main sources using an 11-year urban dataset**

**Máté Vörösmarty et al.**

*Correspondence to:* Máté Vörösmarty (vmate6@student.elte.hu) and Imre Salma (salma.imre@ttk.elte.hu)

The copyright of individual parts of the supplement might differ from the article licence.

**Table S1.** Start and end dates of the measurement years with the median concentrations of total particle number ( $N_{6-1000}$ ; in  $10^3 \text{ cm}^{-3}$ ), NO, NO<sub>2</sub>, O<sub>3</sub>, CO, SO<sub>2</sub> and PM<sub>10</sub> mass (all in  $\mu\text{g m}^{-3}$ ). The measurements in year Y2 were conducted in the near-city background, whereas the other data were obtained in the urban background of Budapest.

| Year | Start       | End         | $N_{6-1000}$ | NO   | NO <sub>2</sub> | O <sub>3</sub> | CO  | SO <sub>2</sub> | PM <sub>10</sub> |
|------|-------------|-------------|--------------|------|-----------------|----------------|-----|-----------------|------------------|
| Y1   | 3–Nov–2008  | 2–Nov–2009  | 11.3         | 13.4 | 37              | 25             | 547 | 5.0             | 33               |
| Y2   | 19–Jan–2012 | 18–Jan–2013 | 4.2          | 3.9  | 15.4            | 51             | 378 | 6.1             | 23               |
| Y3   | 13–Nov–2013 | 12–Nov–2014 | 9.8          | 19.7 | 47              | 18.3           | 489 | 4.8             | 31               |
| Y4   | 13–Nov–2014 | 12–Nov–2015 | 9.4          | 23   | 48              | 20             | 577 | 4.6             | 39               |
| Y5   | 13–Nov–2015 | 12–Nov–2016 | 7.6          | 17.7 | 42              | 25             | 513 | 4.8             | 29               |
| Y6   | 28–Jan–2017 | 27–Jan–2018 | 10.6         | 20   | 44              | 21             | 534 | 4.5             | 28               |
| Y7   | 28–Jan–2018 | 27–Jan–2019 | 10.3         | 17.2 | 43              | 21             | 669 | 5.2             | 36               |
| Y8   | 28–Jan–2019 | 27–Jan–2020 | 10.7         | 26   | 42              | 20             | 625 | 4.9             | 34               |
| Y9   | 28–Jan–2020 | 27–Jan–2021 | 8.6          | 10.8 | 33              | 25             | 526 | 5.0             | 26               |
| Y10  | 28–Jan–2021 | 27–Jan–2022 | 9.6          | 12.9 | 36              | 28             | 589 | 4.5             | 25               |
| Y11  | 28–Jan–2022 | 28–Jan–2023 | 9.0          | 10.5 | 31              | 35             | 607 | 5.2             | 22               |

**Table S2.** Seasonal means  $\pm$  standard deviations of the air temperature ( $T$ , in  $^{\circ}\text{C}$ ), relative humidity (RH, in %), wind speed above the rooftop level (WS, in  $\text{m s}^{-1}$ ) and global radiation for individual values  $> 10 \text{ W m}^{-2}$  (GRad, in  $\text{W m}^{-2}$ ) over the whole measurement interval.

| Parameter | spring         | summer         | autumn         | winter        |
|-----------|----------------|----------------|----------------|---------------|
| $T$       | 13.1 $\pm$ 6.4 | 23.4 $\pm$ 4.9 | 13.0 $\pm$ 6.4 | 2.9 $\pm$ 4.4 |
| RH        | 60 $\pm$ 19    | 59 $\pm$ 18    | 75 $\pm$ 20    | 80 $\pm$ 16   |
| WS        | 3.0 $\pm$ 1.9  | 2.7 $\pm$ 1.6  | 2.4 $\pm$ 1.6  | 2.8 $\pm$ 1.9 |
| GRad      | 375 $\pm$ 211  | 442 $\pm$ 257  | 261 $\pm$ 145  | 163 $\pm$ 83  |

**Table S3.** Final parameters  $A$  and  $C_3$  after their fine-tuning for the uncertainty estimations of the total particle number concentration ( $N_{6-1000}$ ), particle number concentrations for the diameter channels (in nm) and air pollutants (see Eqs. 2 and 3).

| Par.  | $N_{6-1000}$ | 6    | 7.3 | 8.9 | 10.8–451 | 550 | 670 | 816 | 994 | SO <sub>2</sub> | NO  | NO <sub>2</sub> | O <sub>3</sub> | CO   | PM <sub>10</sub> |
|-------|--------------|------|-----|-----|----------|-----|-----|-----|-----|-----------------|-----|-----------------|----------------|------|------------------|
| $A$   | 1            | 4    | 3   | 2   | 1        | 2   | 3   | 4   | 5   | 4               | 4   | 4               | 4              | 4    | 4                |
| $C_3$ | 0.1          | 0.16 | 0.1 | 0.1 | 0.1      | 0.1 | 0.1 | 0.2 | 0.2 | 0.15            | 0.2 | 0.2             | 0.15           | 0.15 | 0.15             |

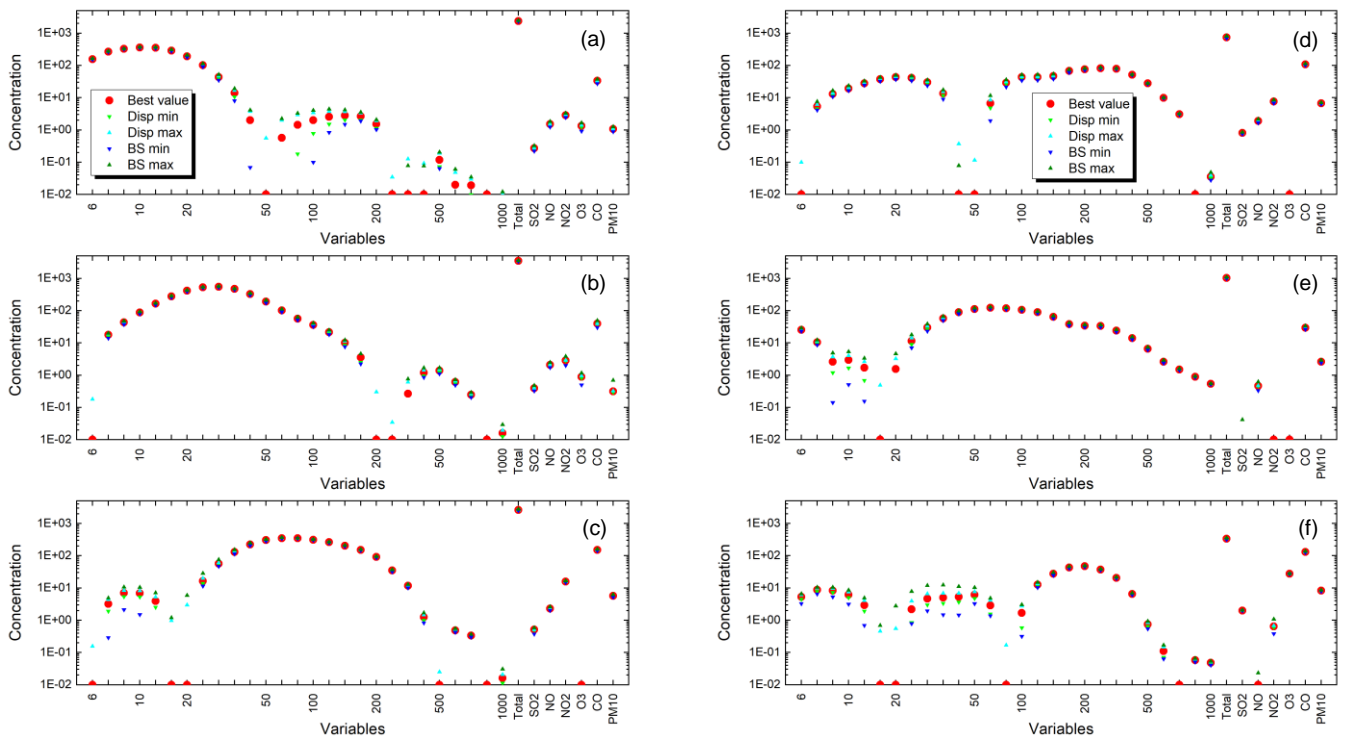

**Figure S1.** Uncertainty estimations by displacement analysis (Disp) and bootstrapping (BS) in the uncorrected PMF modelling for the sources of nucleation (a), vehicle traffic semi-volatile fraction (b), vehicle traffic solid core fraction (c), diffuse urban (d), secondary inorganic aerosol (e) and ozone-associated aerosol (f) in spring. The concentrations are in  $\text{cm}^{-3}$  for the particle numbers, and in  $\mu\text{g m}^{-3}$  for air pollutants. The Best values represent the concentration from the base run.

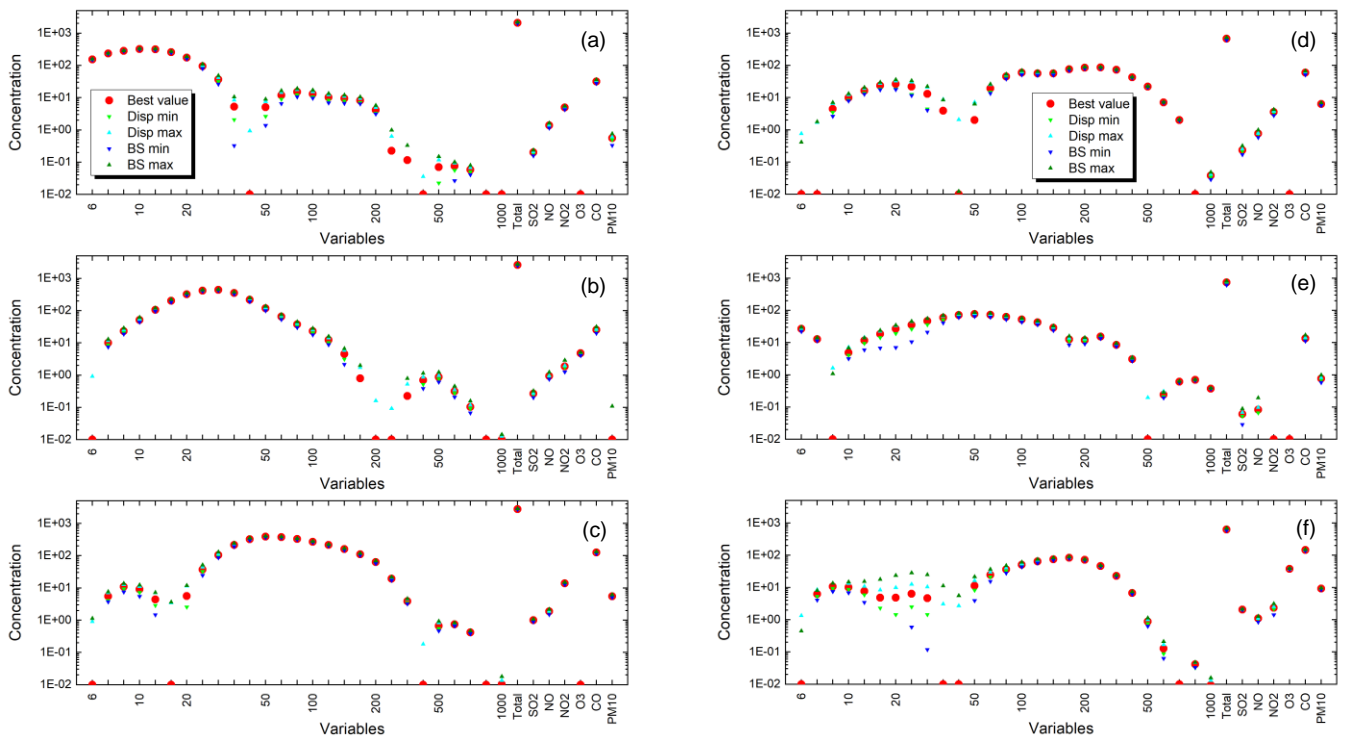

**Figure S2.** Uncertainty estimations by displacement analysis (Disp) and bootstrapping (BS) in the uncorrected PMF modelling for the sources of nucleation (a), vehicle traffic semi-volatile fraction (b), vehicle traffic solid core fraction (c), diffuse urban (d), secondary inorganic aerosol (e) and ozone-associated aerosol (f) in summer. The concentrations are in  $\text{cm}^{-3}$  for the particle numbers, and in  $\mu\text{g m}^{-3}$  for air pollutants. The Best values represent the concentration from the base run.

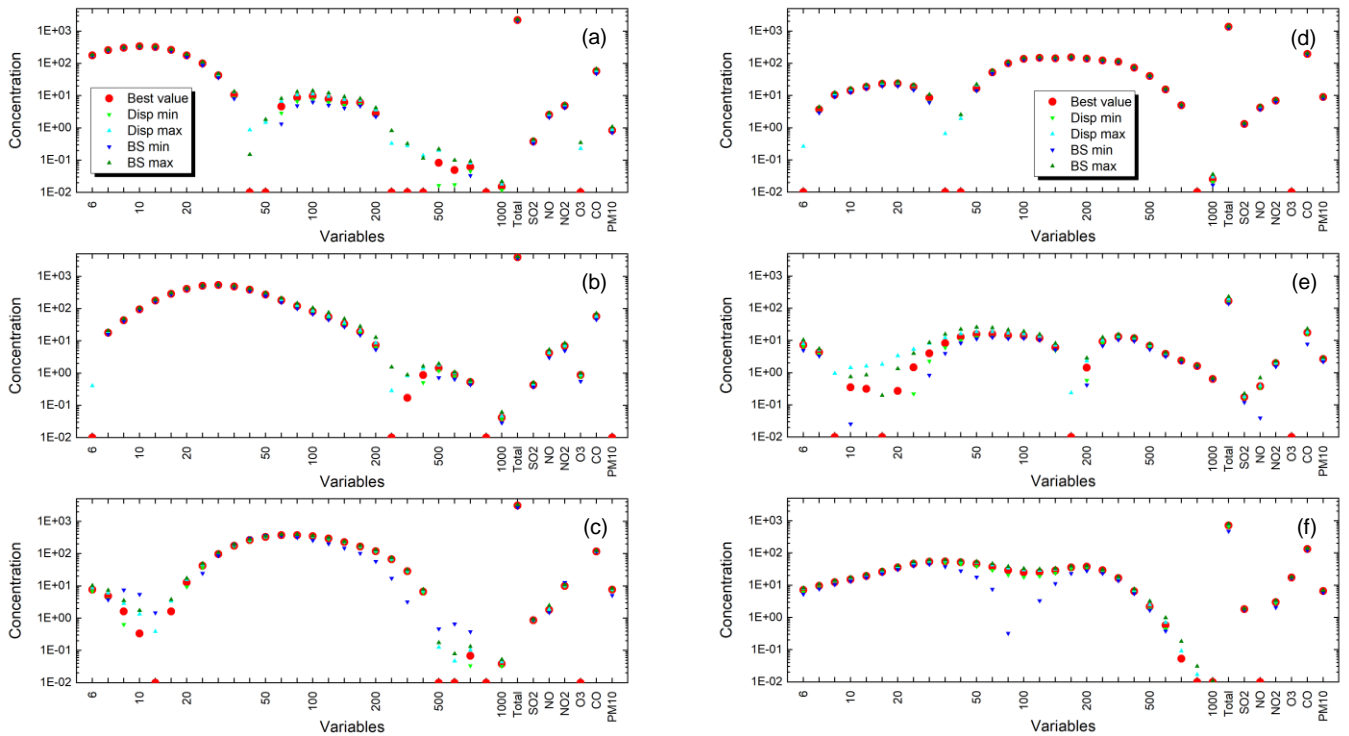

**Figure S3.** Uncertainty estimations by displacement analysis (Disp) and bootstrapping (BS) in the uncorrected PMF modelling for the sources of nucleation (a), vehicle traffic semi-volatile fraction (b), vehicle traffic solid core fraction (c), diffuse urban (d), secondary inorganic aerosol (e) and ozone-associated aerosol (f) in autumn. The concentrations are in  $\text{cm}^{-3}$  for the particle numbers, and in  $\mu\text{g m}^{-3}$  for air pollutants. The Best values represent the concentration from the base run.

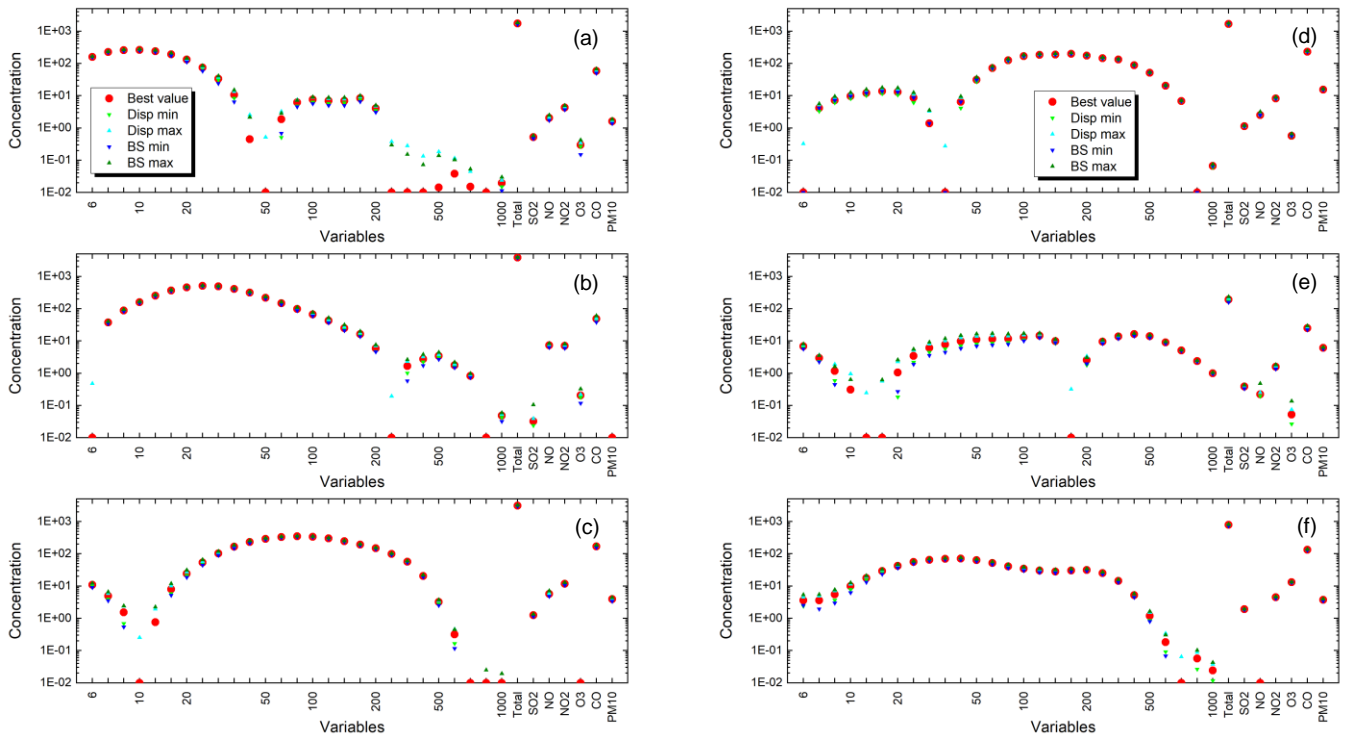

**Figure S4.** Uncertainty estimations by displacement analysis (Disp) and bootstrapping (BS) in the uncorrected PMF modelling for the sources of nucleation (a), vehicle traffic semi-volatile fraction (b), vehicle traffic solid core fraction (c), diffuse urban (d), secondary inorganic aerosol (e) and ozone-associated aerosol (f) in winter. The concentrations are in  $\text{cm}^{-3}$  for the particle numbers, and in  $\mu\text{g m}^{-3}$  for air pollutants. The Best values represent the concentration from the base run.

The mean diel variations of the ventilation coefficient ratio and of its MLH and WS constituents exhibited a pattern consisting of a broad band during the daylight period (Fig. S5). The MLH curves showed the maximum value in summer, a lower, but close time series in spring, the minimum value in winter, and a close, but somewhat higher curve in autumn (Fig. S5a). During the evening and night, the curves were similar to each other. The WS time series displayed the largest values in spring, smaller levels in summer and winter, and the smallest values in autumn (Fig. S5b). As a result, the time series of the  $VC_{ratio}$  over the peak region were similar to each other in spring and summer, while the ratios in autumn and winter were also similar to each other, but smaller (Fig. S5c). The  $VC_{ratio}$  data were above unity (up to 3 in spring and summer) from 07:00 to 16:00 UTC+1, whereas they were  $< 1$  (down to 0.3 in summer) outside this time interval.

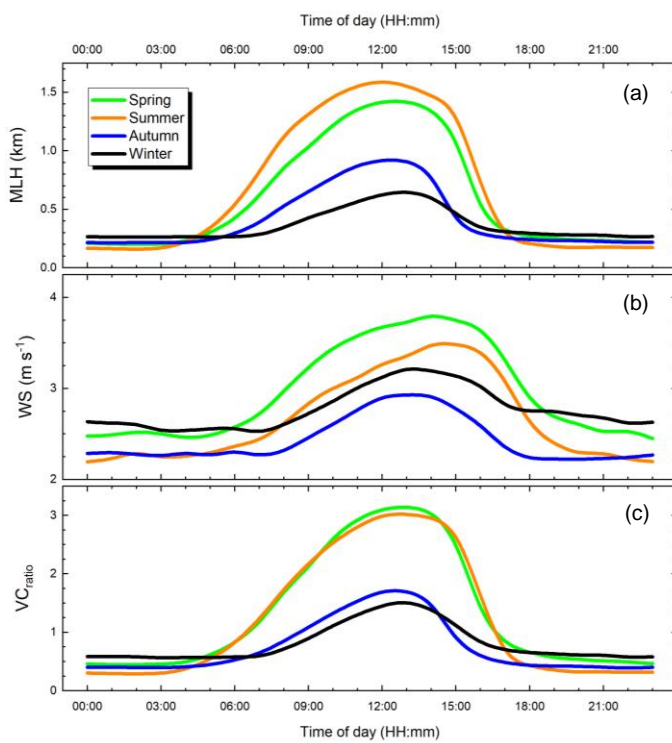

**Figure S5.** Mean diel variations of the planetary boundary mixing layer height (MLH; a), wind speed (WS; b) and ventilation coefficient ratio ( $VC_{ratio}$ ; c) separately for spring, summer, autumn and winter.

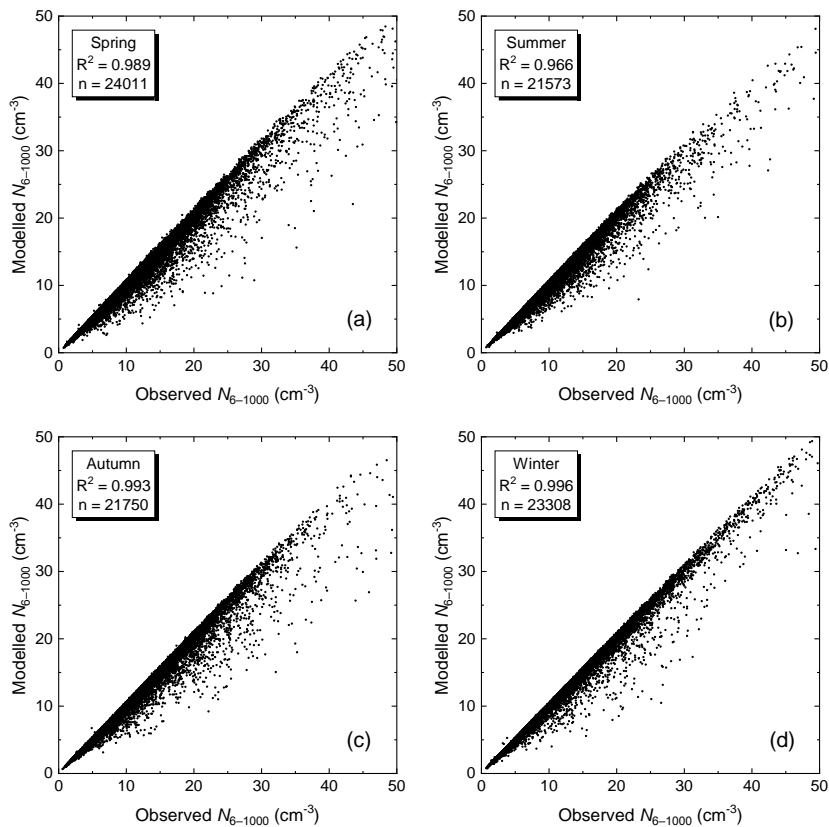

**Figure S6.** Scatter plots of the modelled (by the uncorrected PMF) and measured total particle number concentrations ( $N_{6-1000}$ ) for spring (a), summer (b), autumn (c) and winter (d). The coefficient of determination ( $R^2$ ) and total number of observations ( $n$ ) are also indicated. The seasonal medians of the measured concentrations from spring to winter are  $9.2$ ,  $8.5$ ,  $10.3$  and  $9.9 \times 10^3 \text{ cm}^{-3}$ , respectively.

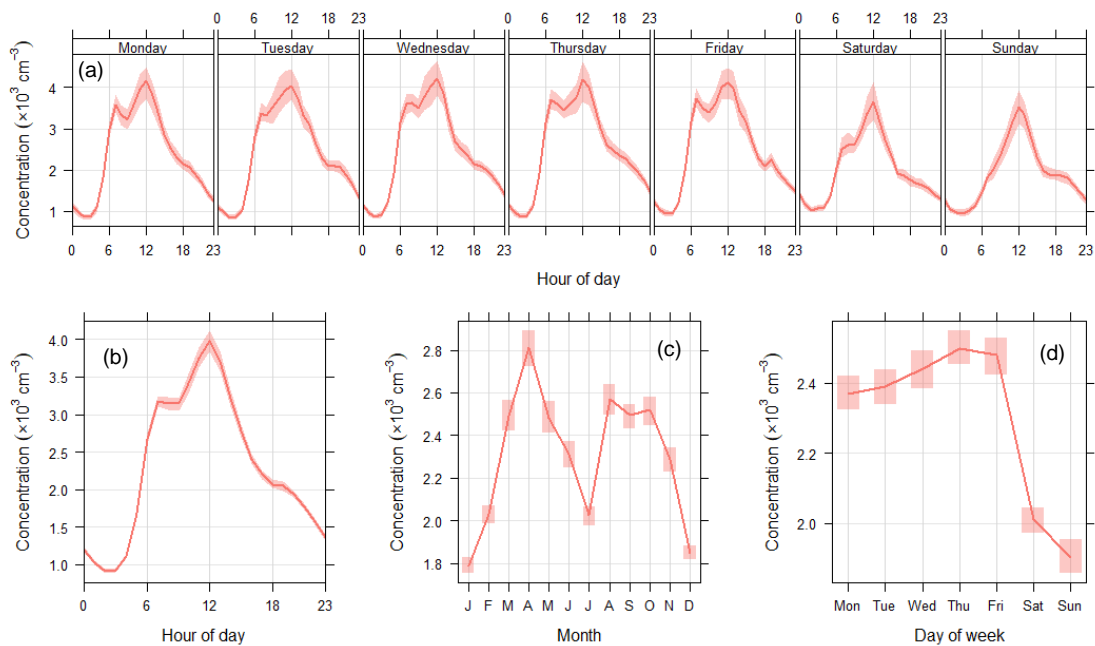

**Figure S7.** Mean variations of the total particle number concentration associated with the nucleation source in the uncorrected PMF modelling as diel time series for day of week (a), for all days (b), as monthly means for month of year (c) and as daily means for day of week (d). The coloured bands around the lines indicate 95 % confidence interval of the mean.

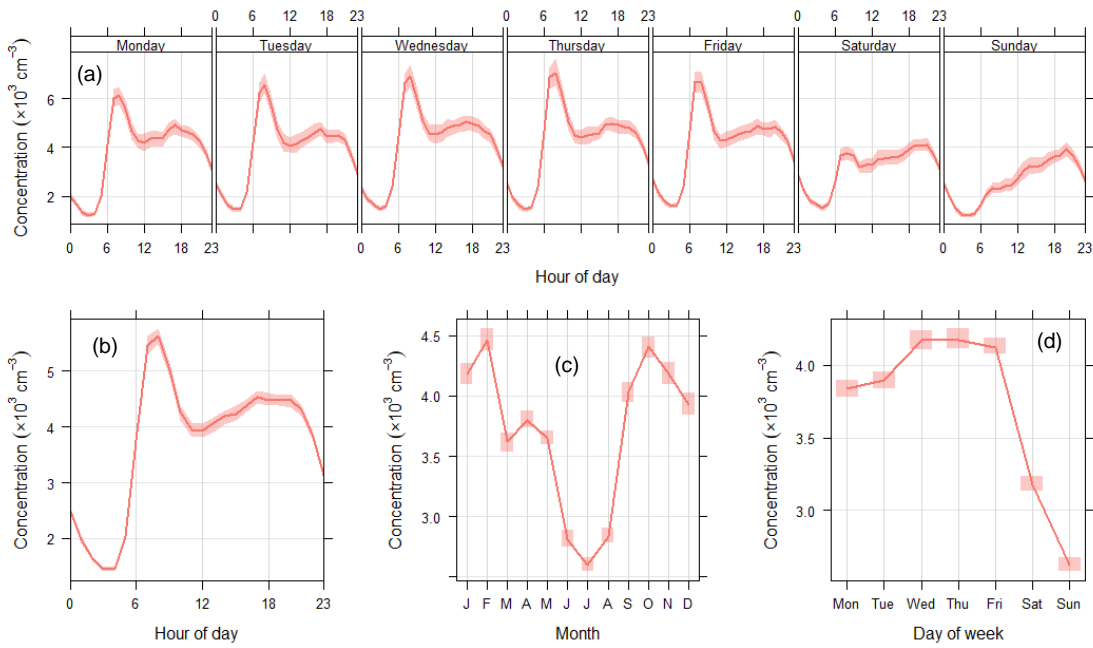

**Figure S8.** Mean variations of the total particle number concentration associated with the vehicle traffic semi-volatile fraction source in the uncorrected PMF modelling as diel time series for day of week (a), for all days (b), as monthly means for month of year (c) and as daily means for day of week (d). The coloured bands around the lines indicate 95 % confidence interval of the mean.

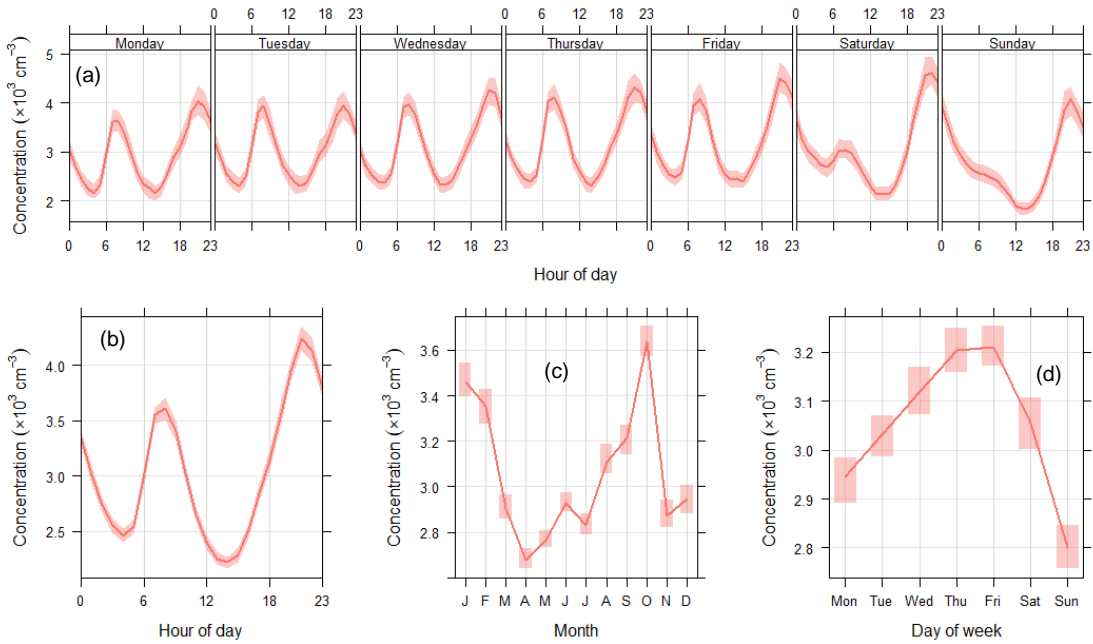

**Figure S9.** Mean variations of the total particle number concentration associated with the vehicle traffic solid core fraction source in the uncorrected PMF modelling as diel time series for day of week (a), for all days (b), as monthly means for month of year (c) and as daily means for day of week (d). The coloured bands around the lines indicate 95 % confidence interval of the mean.

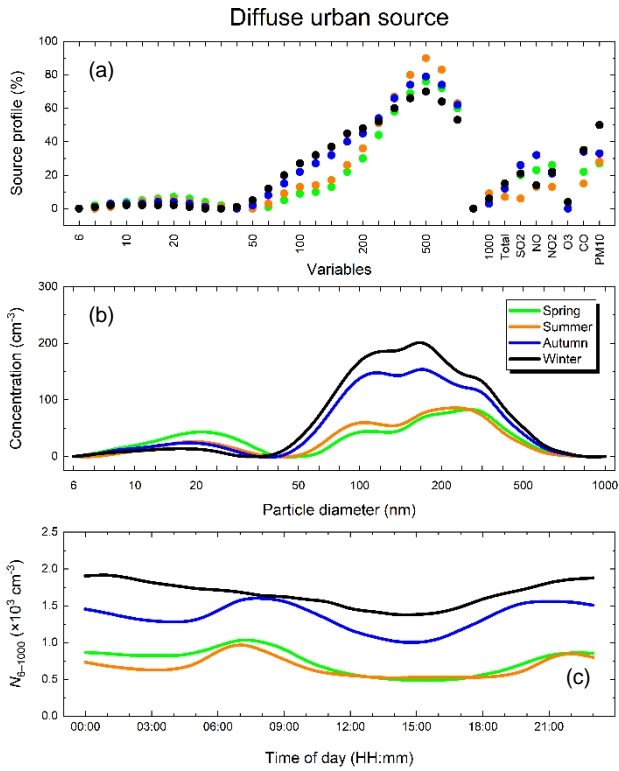

**Figure S10.** Relative factor profiles (a), factor contributions to the particle number concentrations in the size channels (b), and mean diel variations of the total particle number concentration ( $N_{6-1000}$ ; c) assigned to the urban diffuse source in the uncorrected PMF modelling for spring, summer, autumn and winter. The exact diameters of the size channels are listed in Sect. 2.1.

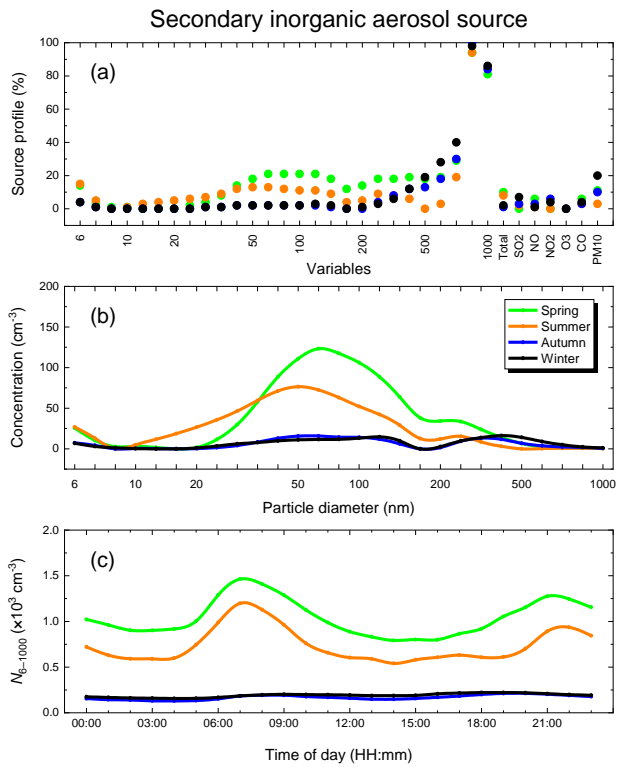

**Figure S11.** Relative factor profiles (a), factor contributions to the particle number concentrations in the size channels (b), and mean diel variations of the total particle number concentration ( $N_{6-1000}$ ; c) assigned to the source of secondary inorganic aerosol in the uncorrected PMF modelling for spring, summer, autumn and winter. The exact diameters of the size channels are listed in Sect. 2.1.



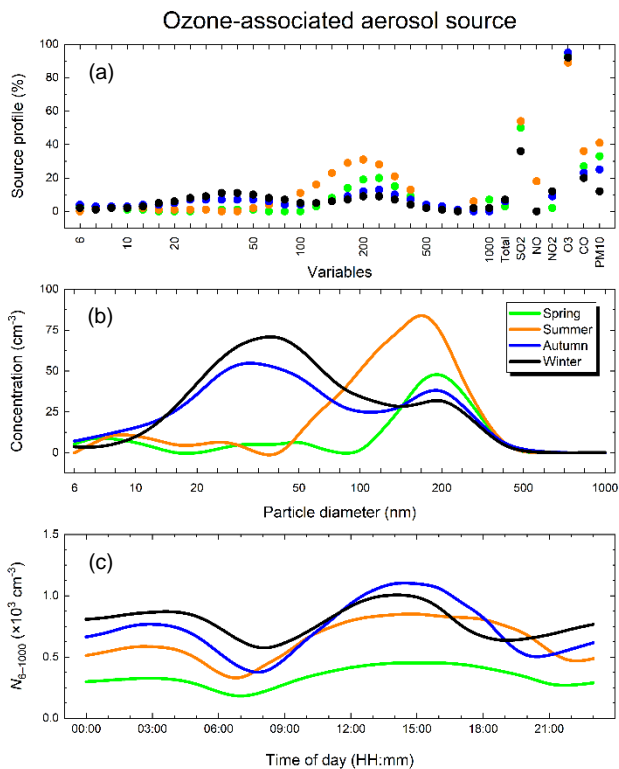

**Figure S12.** Relative factor profiles (a), factor contributions to the particle number concentrations in the size channels (b), and mean diel variations of the total particle number concentration ( $N_{6-1000}$ ; c) assigned to the  $\text{O}_3$ -associated secondary aerosol source in the uncorrected PMF modelling for spring, summer, autumn and winter. The exact diameters of the size channels are listed in Sect. 2.1.

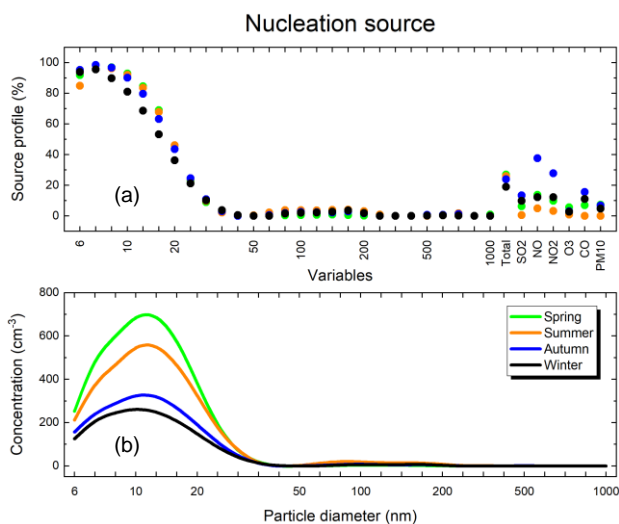

**Figure S13.** Relative factor profiles (a) and factor contributions to the particle number concentrations in the size channels (b) assigned to the nucleation source in the dispersion-corrected PMF modelling for spring, summer, autumn and winter. The exact diameters of the size channels are listed in Sect. 2.1.

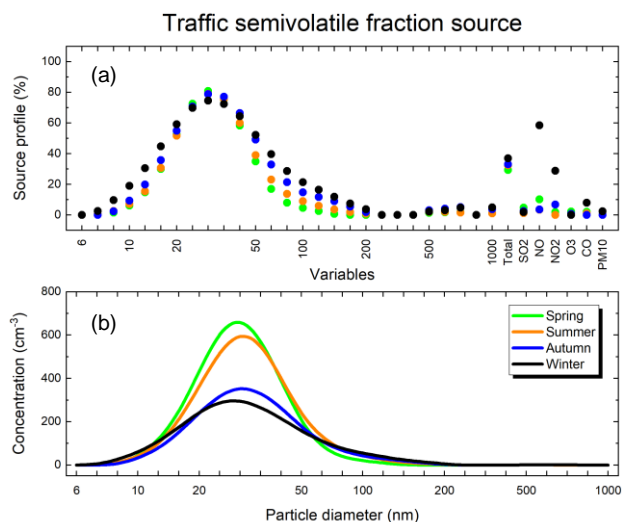

**Figure S14.** Relative factor profiles (a) and factor contributions to the particle number concentrations in the size channels (b) assigned to the road vehicle traffic semi-volatile fraction source in the dispersion-corrected PMF modelling for spring, summer, autumn and winter. The exact diameters of the size channels are listed in Sect. 2.1.

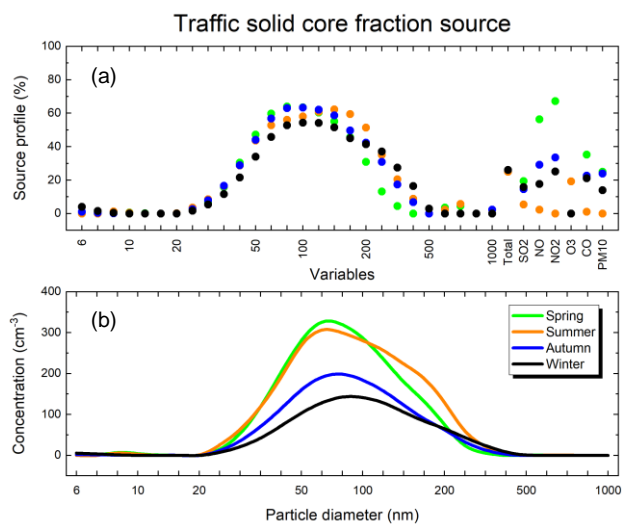

**Figure S15.** Relative factor profiles (a) and factor contributions to the particle number concentrations in the size channels (b) assigned to road vehicle traffic solid core fraction sources in the dispersion-corrected PMF modelling for spring, summer, autumn and winter. The exact diameters of the size channels are listed in Sect. 2.1.

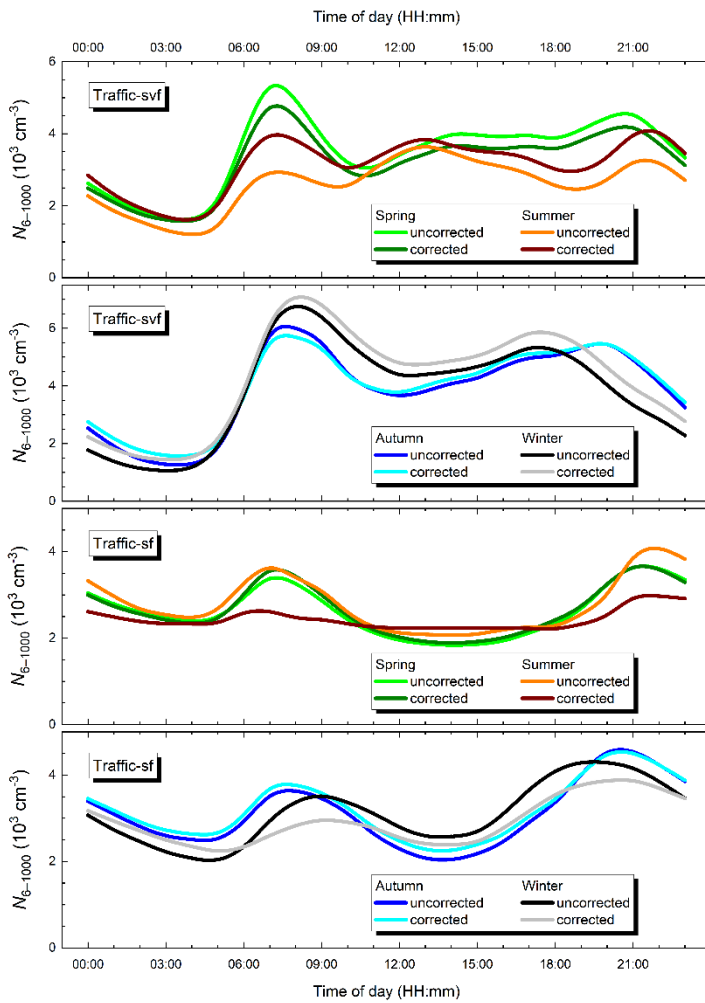

**Figure S16.** Mean diel variations of the road vehicle traffic semi-volatile fraction (traffic-svf) and road vehicle traffic solid core fraction (traffic-sf) sources derived by the uncorrected PMF and dispersion-corrected PMF models in spring, summer, autumn and winter.

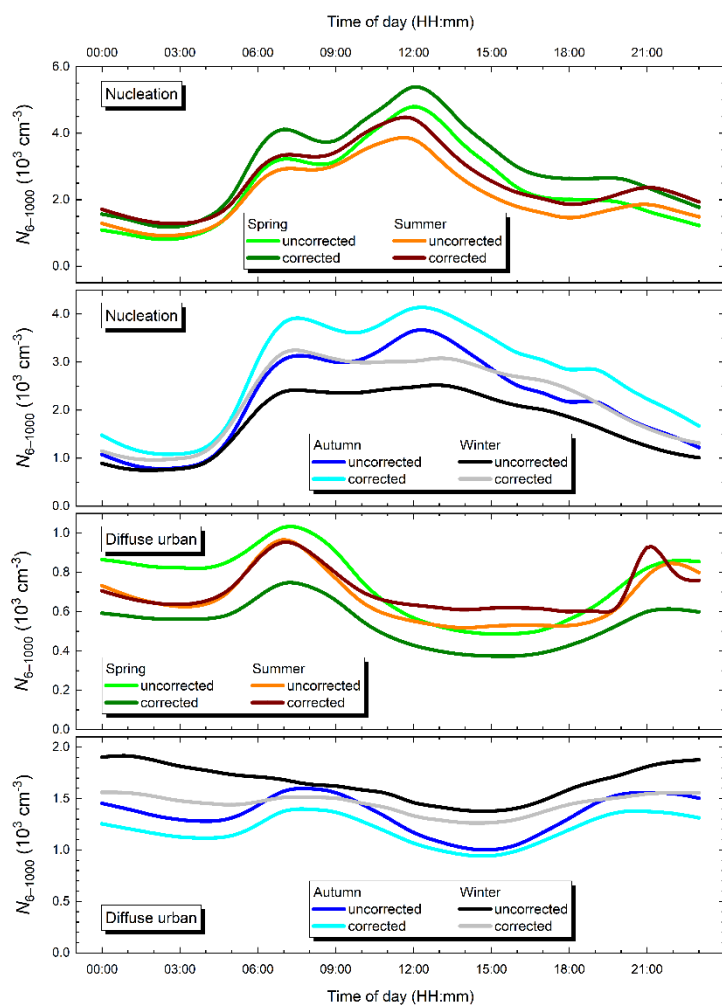

**Figure S17.** Mean diel variations of the nucleation and diffuse urban sources derived by the uncorrected PMF and dispersion-corrected PMF models in spring, summer, autumn and winter.

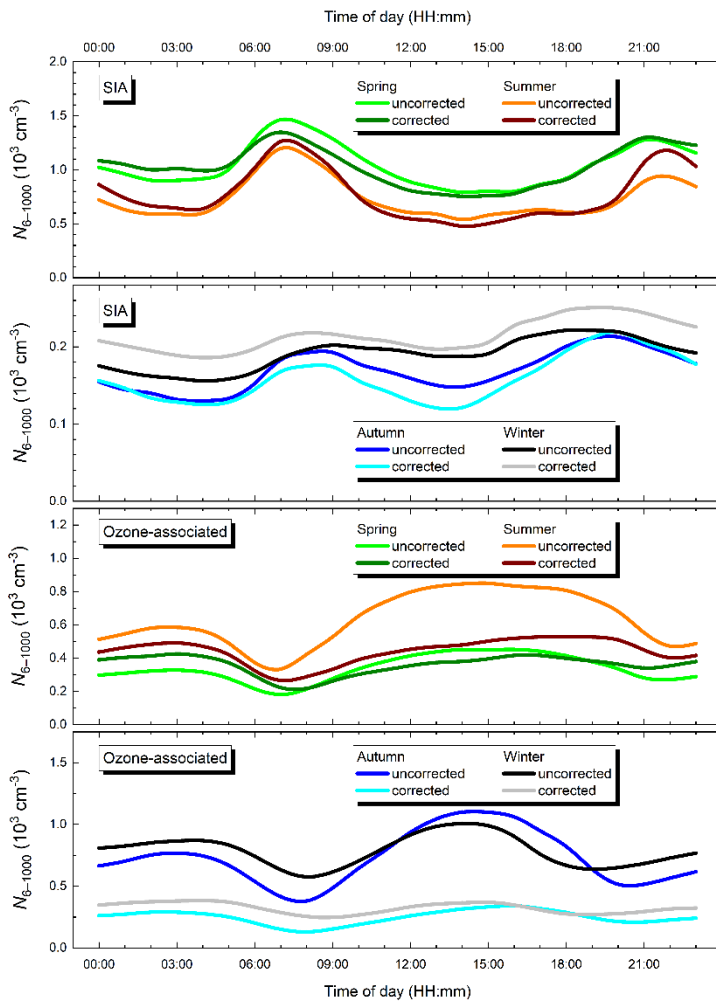

**Figure S18.** Mean diel variations of sources of the secondary inorganic aerosol (SIA) and ozone-associated secondary aerosol derived by the uncorrected PMF and dispersion-corrected PMF models in spring, summer, autumn and winter.

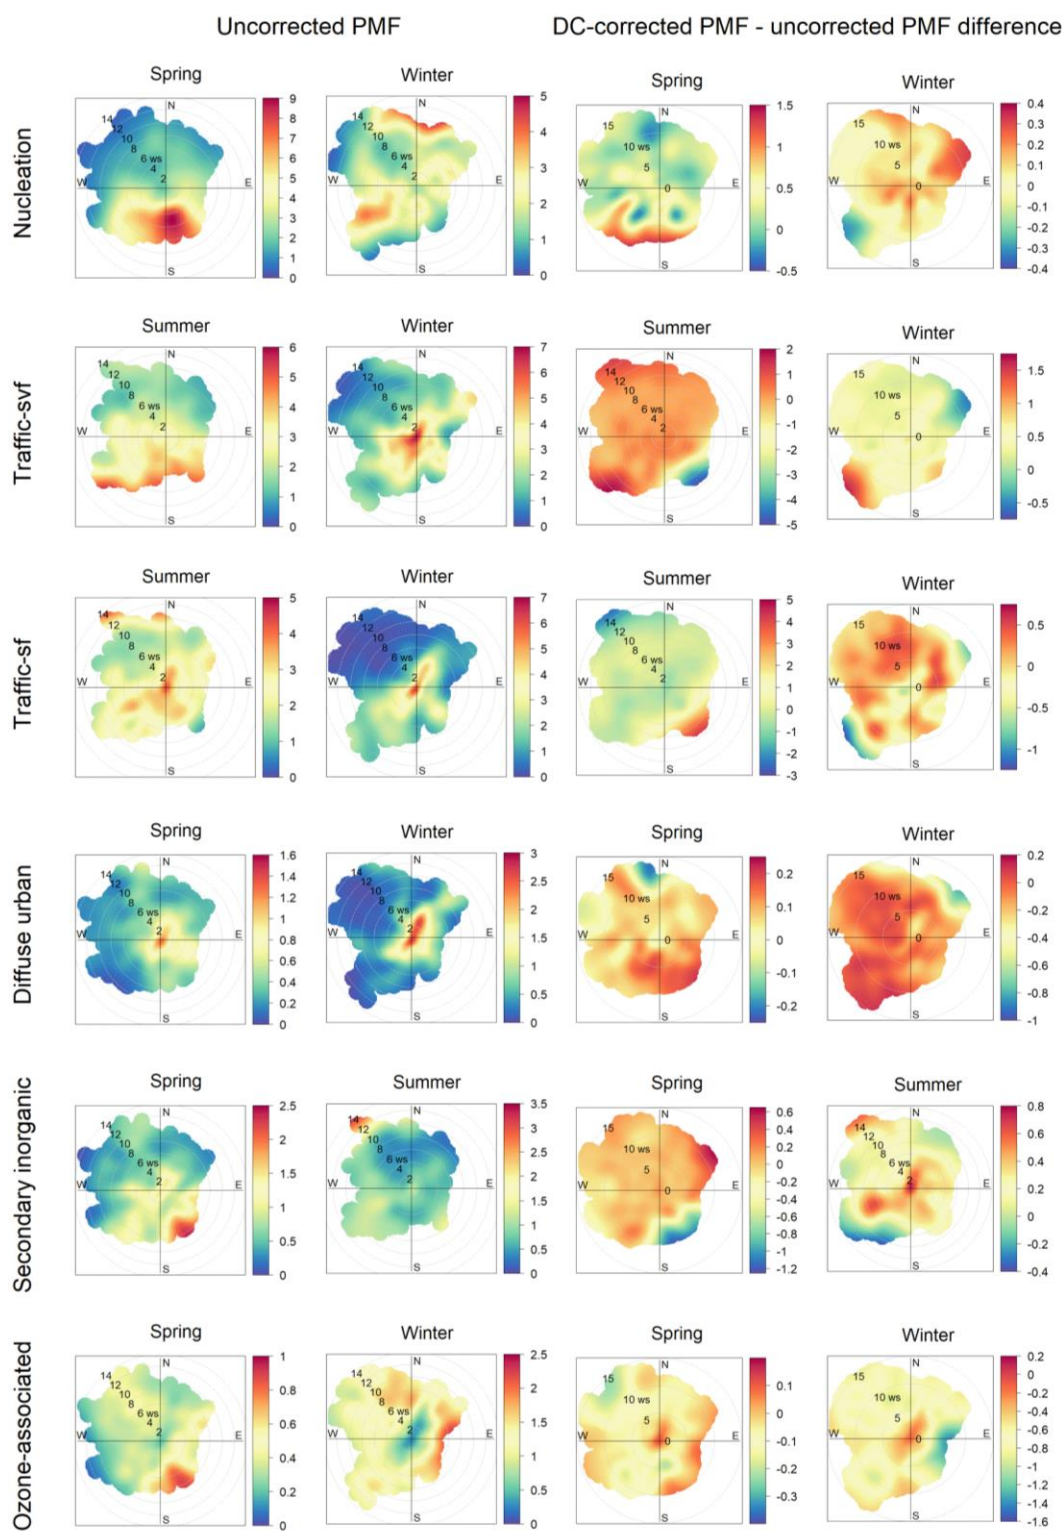

**Figure S19.** Conditional bivariate probability plots of the contributions to the total particle number concentration ( $N_{6-1000}$ ; in  $10^3 \text{ cm}^{-3}$ ; first and second columns from left) from the nucleation, road vehicle traffic semi-volatile fraction (traffic-svf), road vehicle traffic solid core fraction (traffic-sf), diffuse urban, secondary inorganic aerosol and ozone-associated secondary aerosol sources derived by the uncorrected PMF model, and the (DC-PMF – uncorrected PMF) difference for the  $N_{6-1000}$  (in  $10^3 \text{ cm}^{-3}$ ; third and fourth columns from left) in selected season pairs. The values of the WS are given in  $\text{m s}^{-1}$ . Note the different scales of the colour bar.
